# Supplementary material for: Swelling and mechanical properties of thermoresponsive/hydrophilic conetworks with crosslinked domain structures prepared from various triblock precursors
Source: Royal Society of Chemistry journal article supplement (doi:10.1039/c9py01417a), 2019-01-01
Supplement: c9py01417a1.pdf [file c9py01417a1.pdf]

*Electronic Supplementary Information*

**Swelling and mechanical properties of thermoresponsive/hydrophilic  
conetworks with crosslinked domain structure prepared from various triblock  
precursors**

*Shohei Ida, Miki Morimura, Hironobu Kitanaka, Yoshitsugu Hirokawa, and Shokyoku Kanaoka*

Department of Materials Science, The University of Shiga Prefecture,

2500 Hassaka, Hikone, Shiga 522-8533, Japan

E-mail: ida.s@mat.usp.ac.jp, kanaoka.s@mat.usp.ac.jp

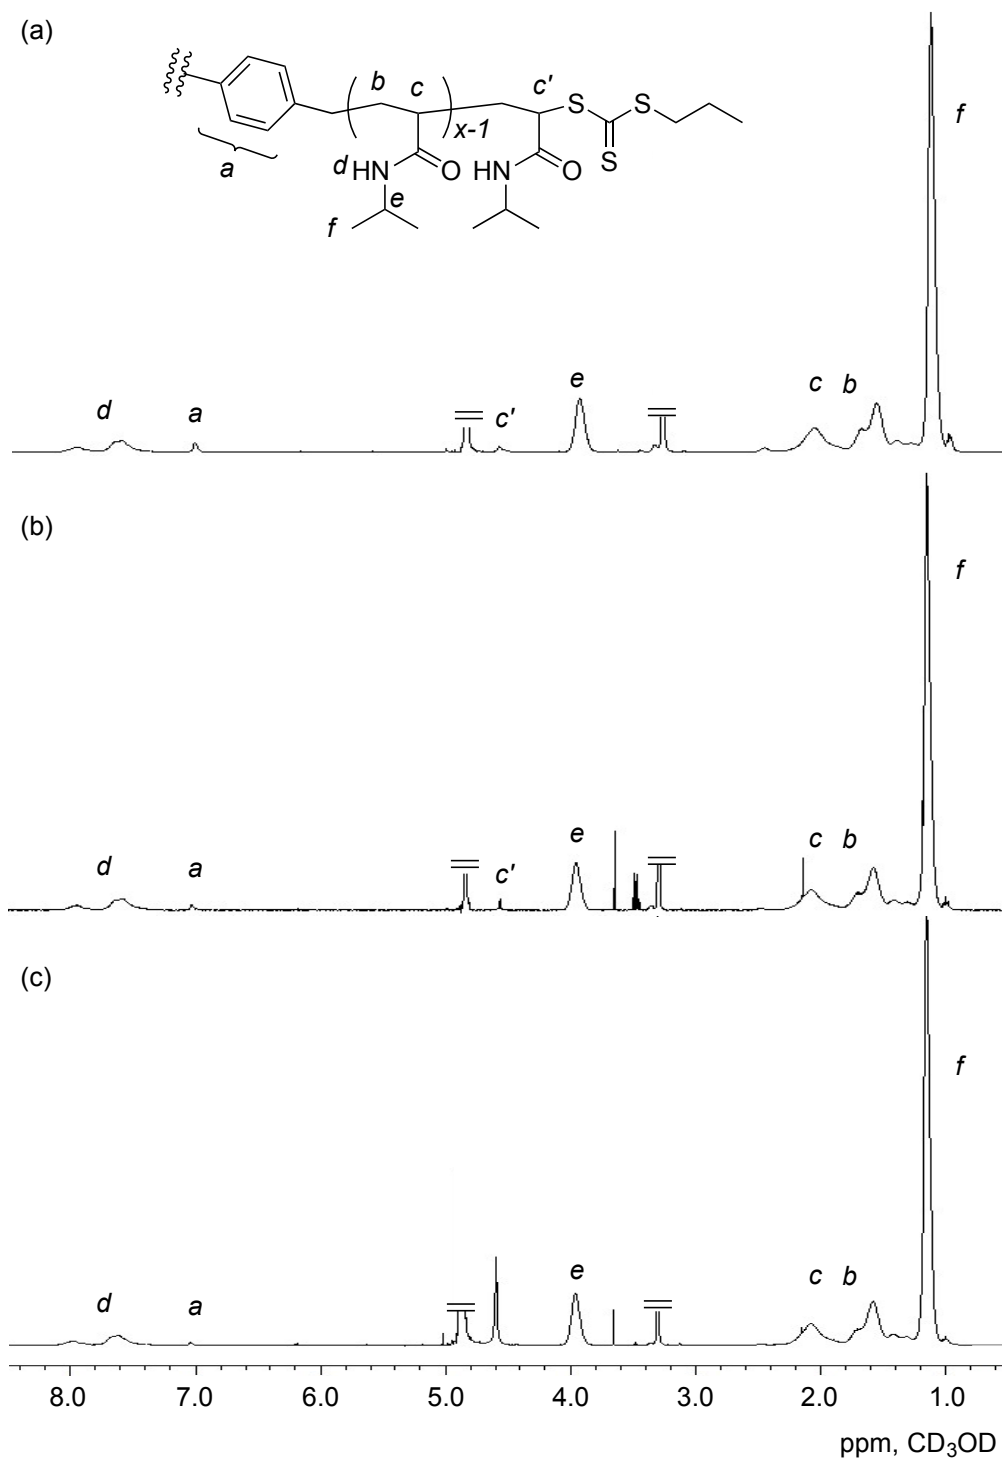

**Fig. S1** <sup>1</sup>H NMR spectra of PNIPAAm macro-CTAs prepared by RAFT polymerization: (a) **N1**, (b) **N2**, and (c) **N3**. Polymerization condition: see Table 1.

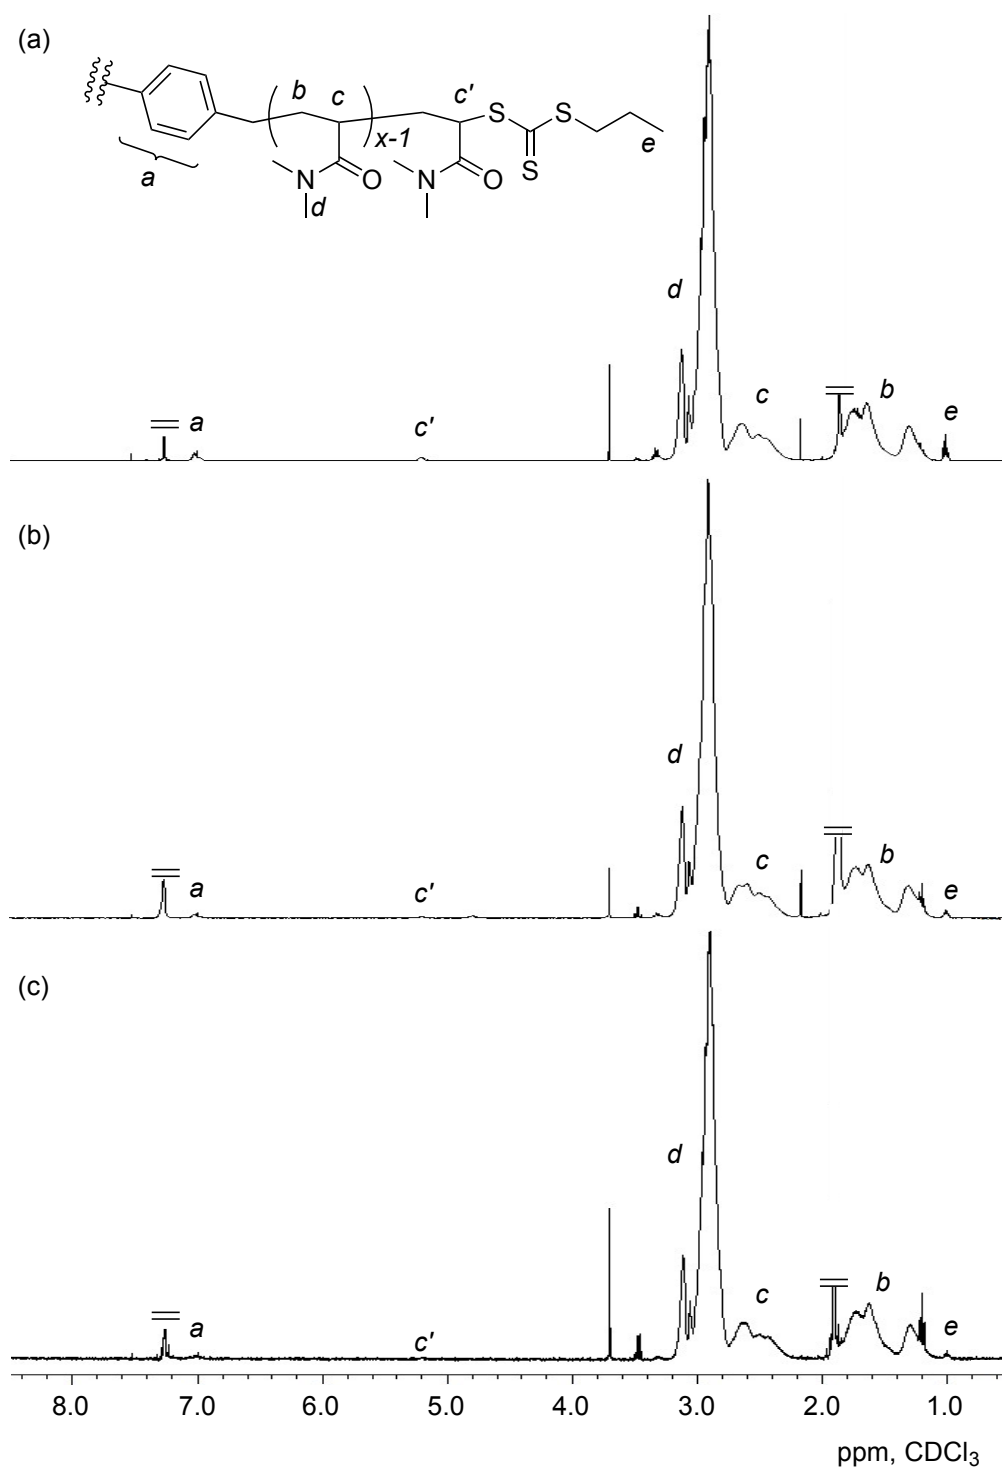

**Fig. S2**  $^1\text{H}$  NMR spectra of PDMAAm macro-CTAs prepared by RAFT polymerization: (a) **D1**, (b) **D2**, and (c) **D3**. Polymerization condition: see Table 1.

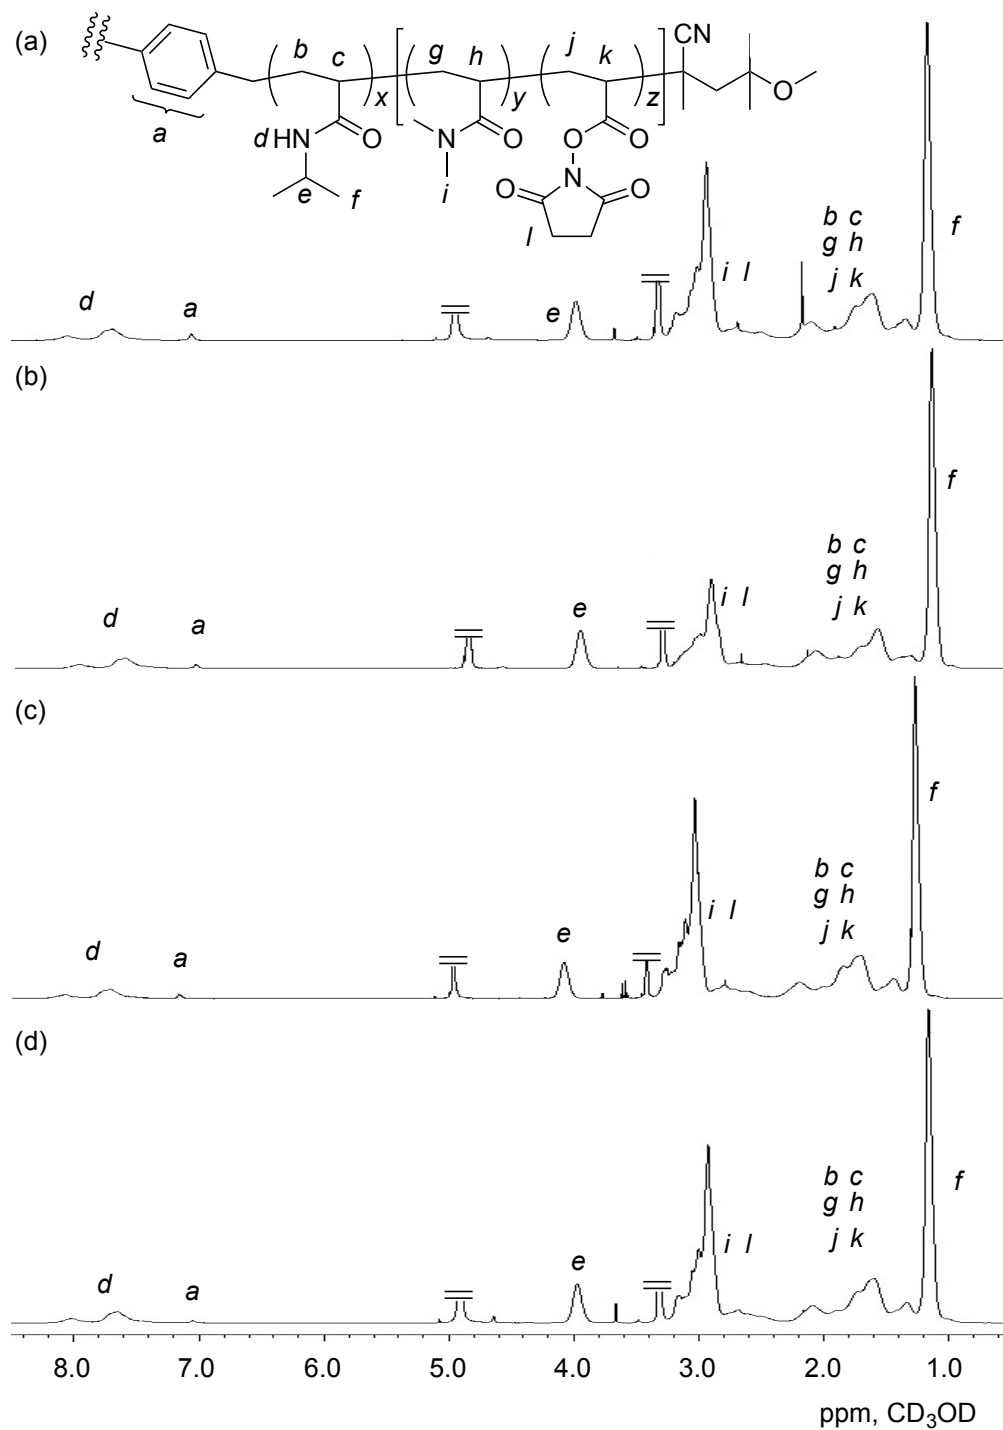

**Fig. S3**  $^1\text{H}$  NMR spectra of triblock precursor polymers with DND sequence prepared by RAFT block polymerization: (a) **DND1**, (b) **DND2**, (c) **DND3**, and (d) **DND4**. Polymerization condition: see Table 2.
